# Supplementary material
Source: PubMed Central journal article supplement (PMC3338343)

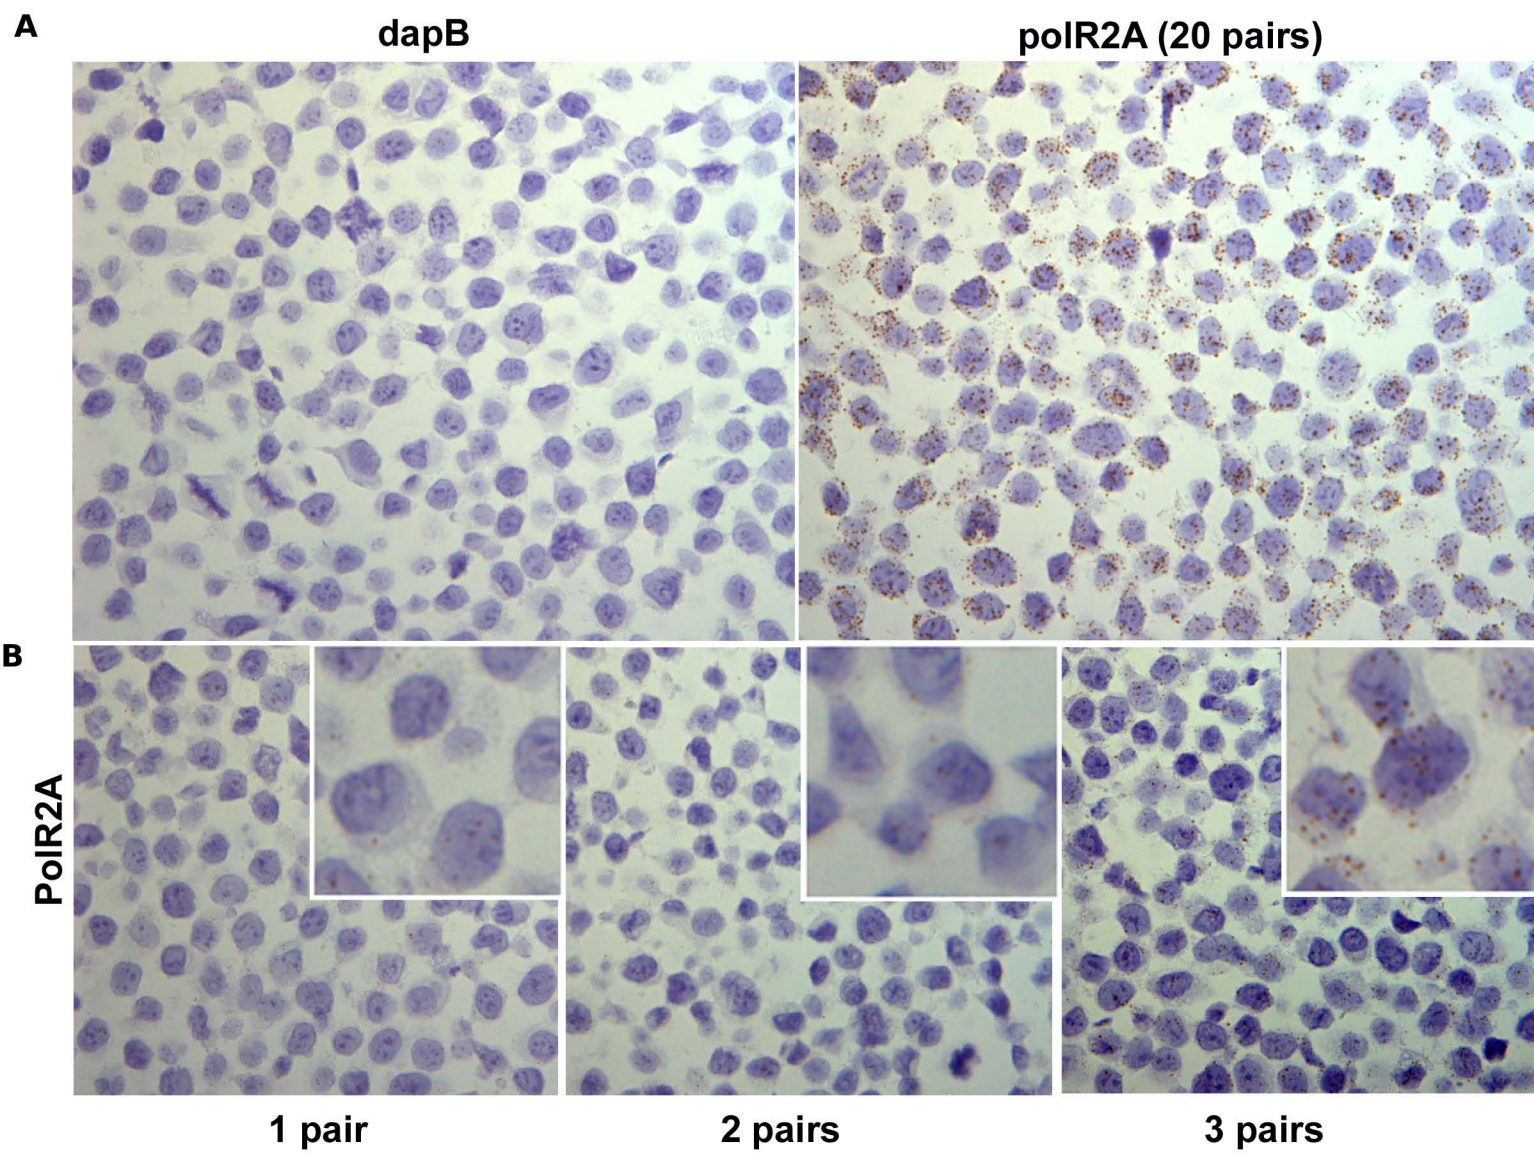

**Fig S1**

Supplement: mmc1.pdf [file mmc1.pdf]

SiHa (HPV-16+)

HeLa (HPV-18+)

MS751 (HPV-45+)

HPV-16/DAPI

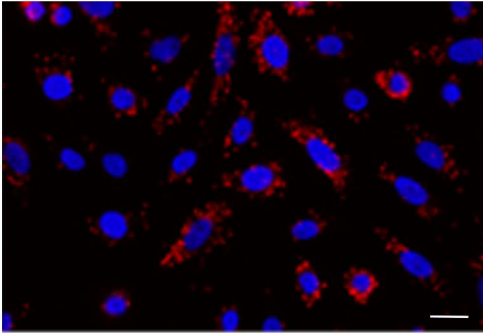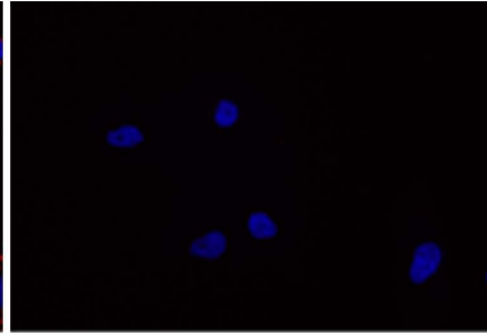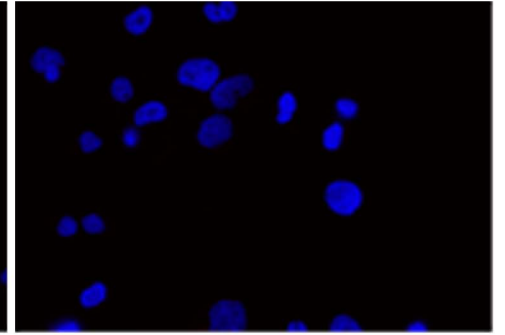

HPV-18/DAPI

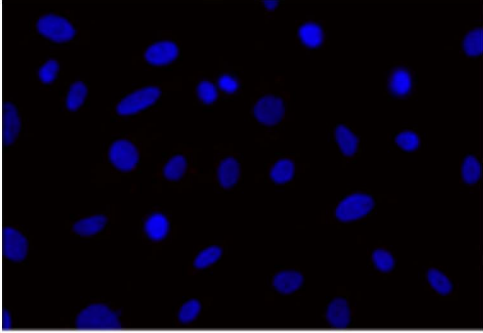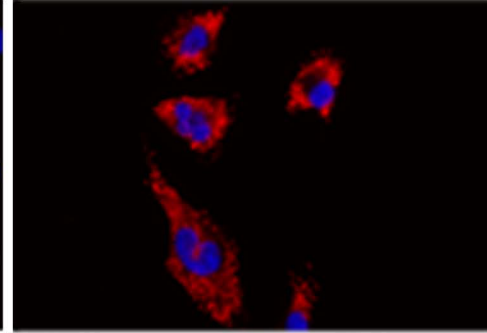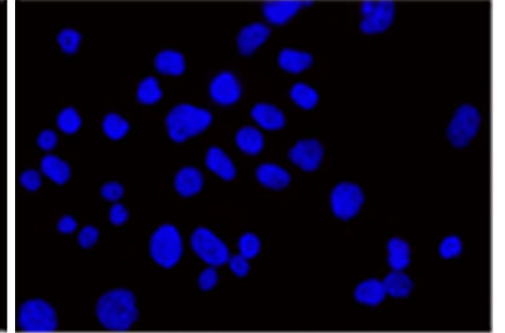

HPV-45/DAPI

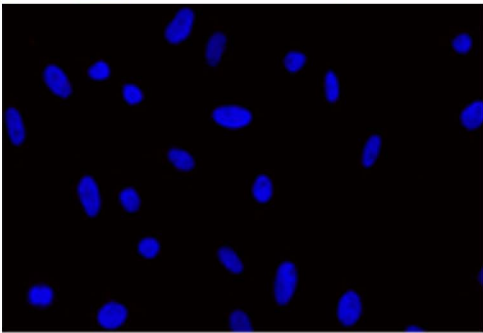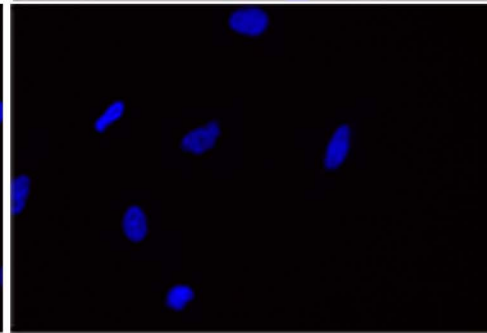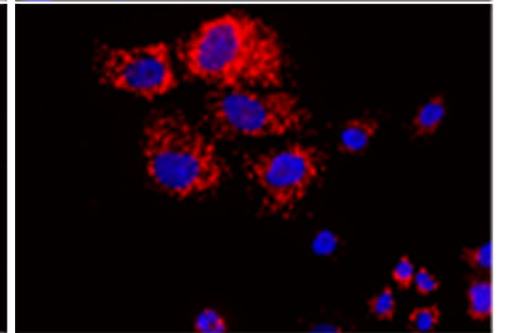

**Fig S2**

Supplement: mmc2.pdf [file mmc2.pdf]

**A**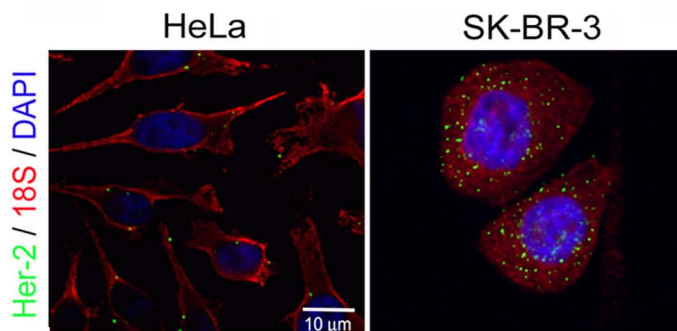**B**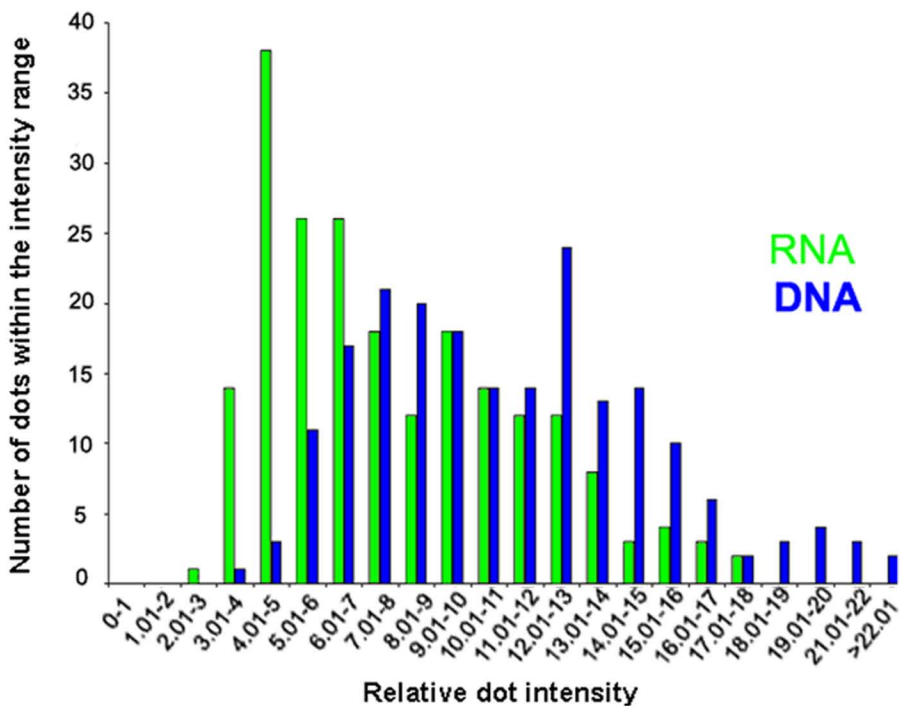

Supplement: mmc3.pdf [file mmc3.pdf]
